# Supplementary material for: Evolved pesticide tolerance influences susceptibility to parasites in amphibians
Source: PubMed Central journal article supplement (PMC5680434; doi:10.1111/eva.12500), 2017-07-04

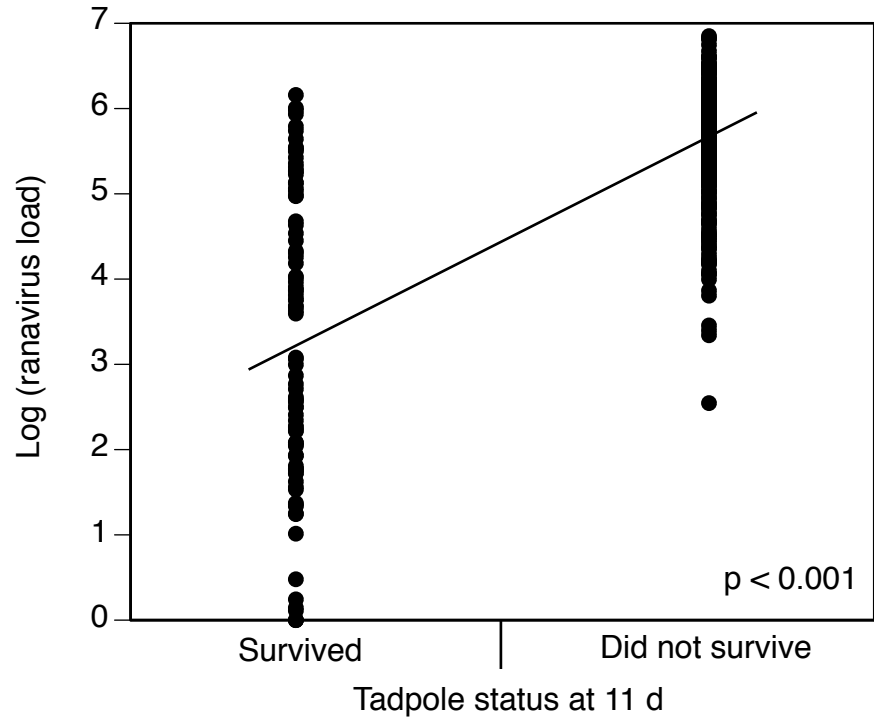

Supplement: EVA-10-802-s005.pdf [file EVA-10-802-s005.pdf]
